# Supplementary material
Source: publisher figshare collection journal article supplement (https://frontiersin.figshare.com/ndownloader/files/12548639)
Supplement: Supplementary file [file 12548639]

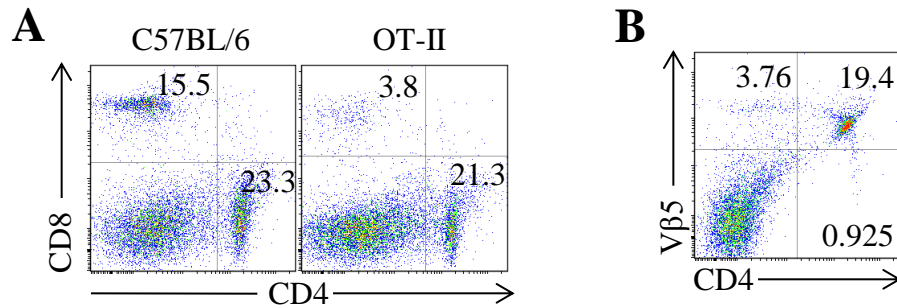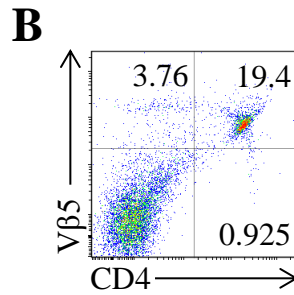

**Figure S1. Phenotypic analysis of OT-II transgenic mice.** (A) Flow cytometry analysis of CD4<sup>+</sup> and CD8<sup>+</sup> T cells in spleen cells collected from C57BL/6 and OT-II mice. Numbers in the dot plots represent the percentages of CD4<sup>+</sup> or CD8<sup>+</sup> cells. (B) Flow cytometry analysis of Vβ5-expressing CD4<sup>+</sup> T cells in spleen cells collected from OT-II mice. Numbers in the dot plots represent the percentages of Vβ5<sup>+</sup>CD4<sup>+</sup>, Vβ5<sup>+</sup>CD4<sup>-</sup> or Vβ5<sup>-</sup>CD4<sup>+</sup> cells. Data are representative of three independent experiments .

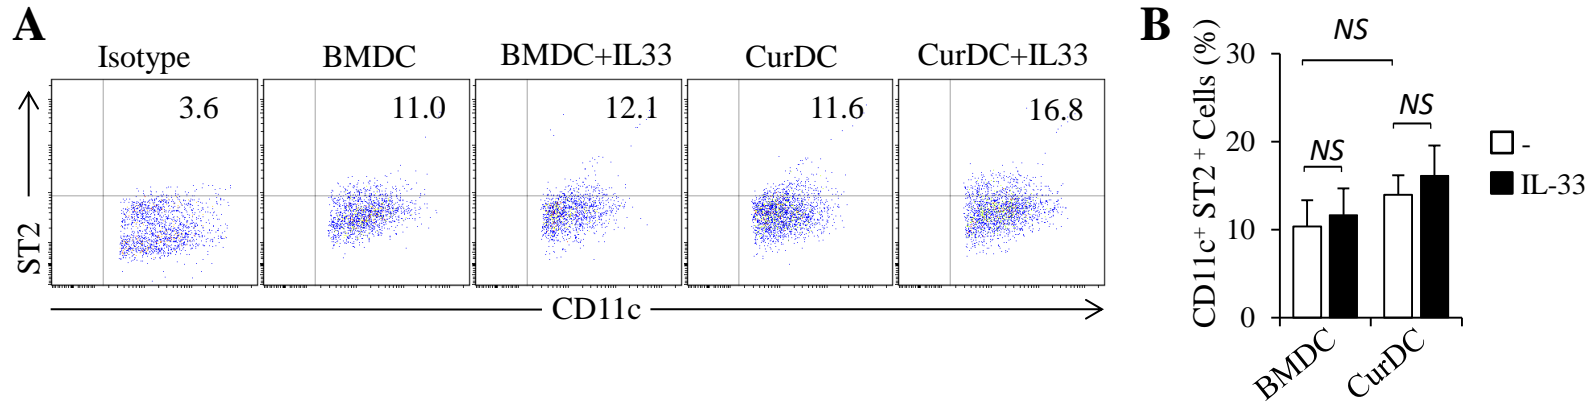

**Figure S2. The expression of ST2 in BMDCs and CurDCs with or without IL-33 treatment.** Mouse iDCs were matured by TNF- $\alpha$ /IL-1 $\beta$  (BMDC), Curdlan (CurDC) in the presence of absence of IL-33 (50 ng/mL) for 48 hours. **(A)** flow cytometry analysis of ST2<sup>+</sup>CD11c<sup>+</sup> cells. Numbers in the dot plots represent the percentages of ST2<sup>+</sup>CD11c<sup>+</sup> cells. **(B)** summarized results of three independent experiments obtained in (A). **The experiments were performed three times (n=3).** Data are representative of three (A) independent experiments or presented as mean  $\pm$  SD of three (B) independent experiments. NS, non-significant.

**A**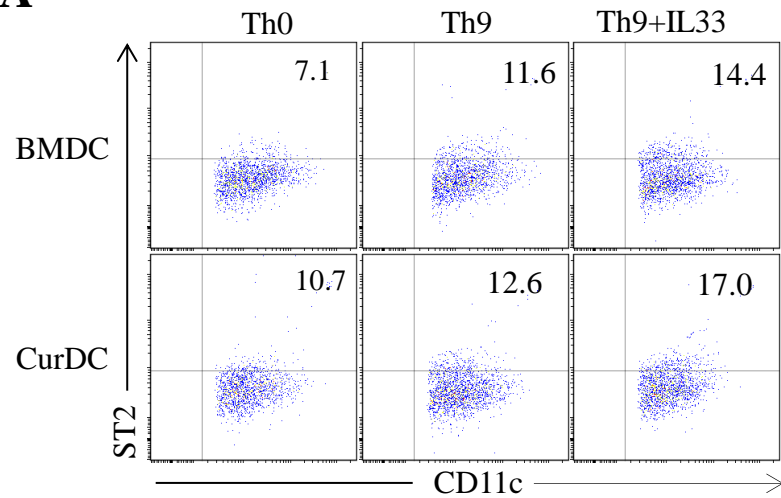**B**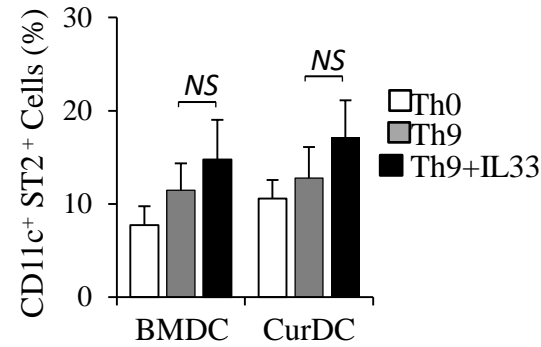

**Figure S3. The effects of IL-33 on ST2 expression by BMDCs and CurDCs in the *in vitro* Th9-priming cultures.** Naïve CD4<sup>+</sup> T cells were cocultured with BMDCs or CurDCs under Th9 polarizing conditions in the presence or absence of IL-33. Cell cultures without (Th0) addition of Th9-polarizing cytokines TGF- $\beta$  and IL-4 were used as controls. Cells were cultured for 24 hours. **(A)** flow cytometry analysis of ST2<sup>+</sup>CD11c<sup>+</sup> cells. Numbers in the dot plots represent the percentages of ST2<sup>+</sup>CD11c<sup>+</sup> cells. **(B)** summarized results of three independent experiments obtained in (A). **The experiments were performed three times (n=3).** Data are representative of three (A) independent experiments or presented as mean  $\pm$  SD of three (B) independent experiments. NS, non-significant.

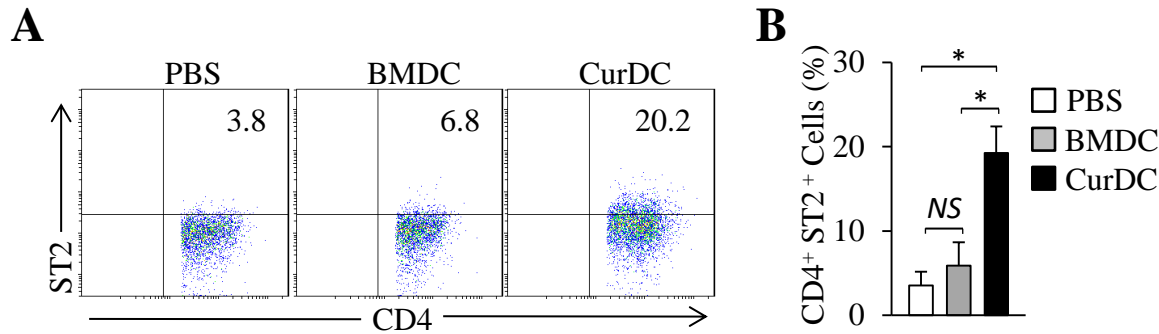

**Figure S4. Dectin-1-activated DC immunization stimulates ST2 expression by CD4<sup>+</sup> T cells.** C57BL/6 mice (2 to 3 mice/group) were immunized twice (one week apart) with TRP1-peptide-pulsed BMDCs or CurDCs. PBS served as control. On day 3 after the 2<sup>nd</sup> immunization, total leukocytes from spleen cells were harvested and restimulated with TRP1-peptide-pulsed BMDCs and CurDCs respectively for 48 hours in the culture. Cells from PBS control mice were cultured without addition of DCs. (A) flow cytometry analysis of ST2<sup>+</sup>CD4<sup>+</sup> T cells. Numbers in the dot plots represent the percentages of ST2<sup>+</sup>CD4<sup>+</sup> T cells. (B) summarized results of three independent experiments obtained in (A). The experiments were performed three times (n=3). Data are representative of three (A) independent experiments or presented as mean  $\pm$  SD of three (B) independent experiments. NS, non-significant; \* $P < 0.05$  (Student *t* test).

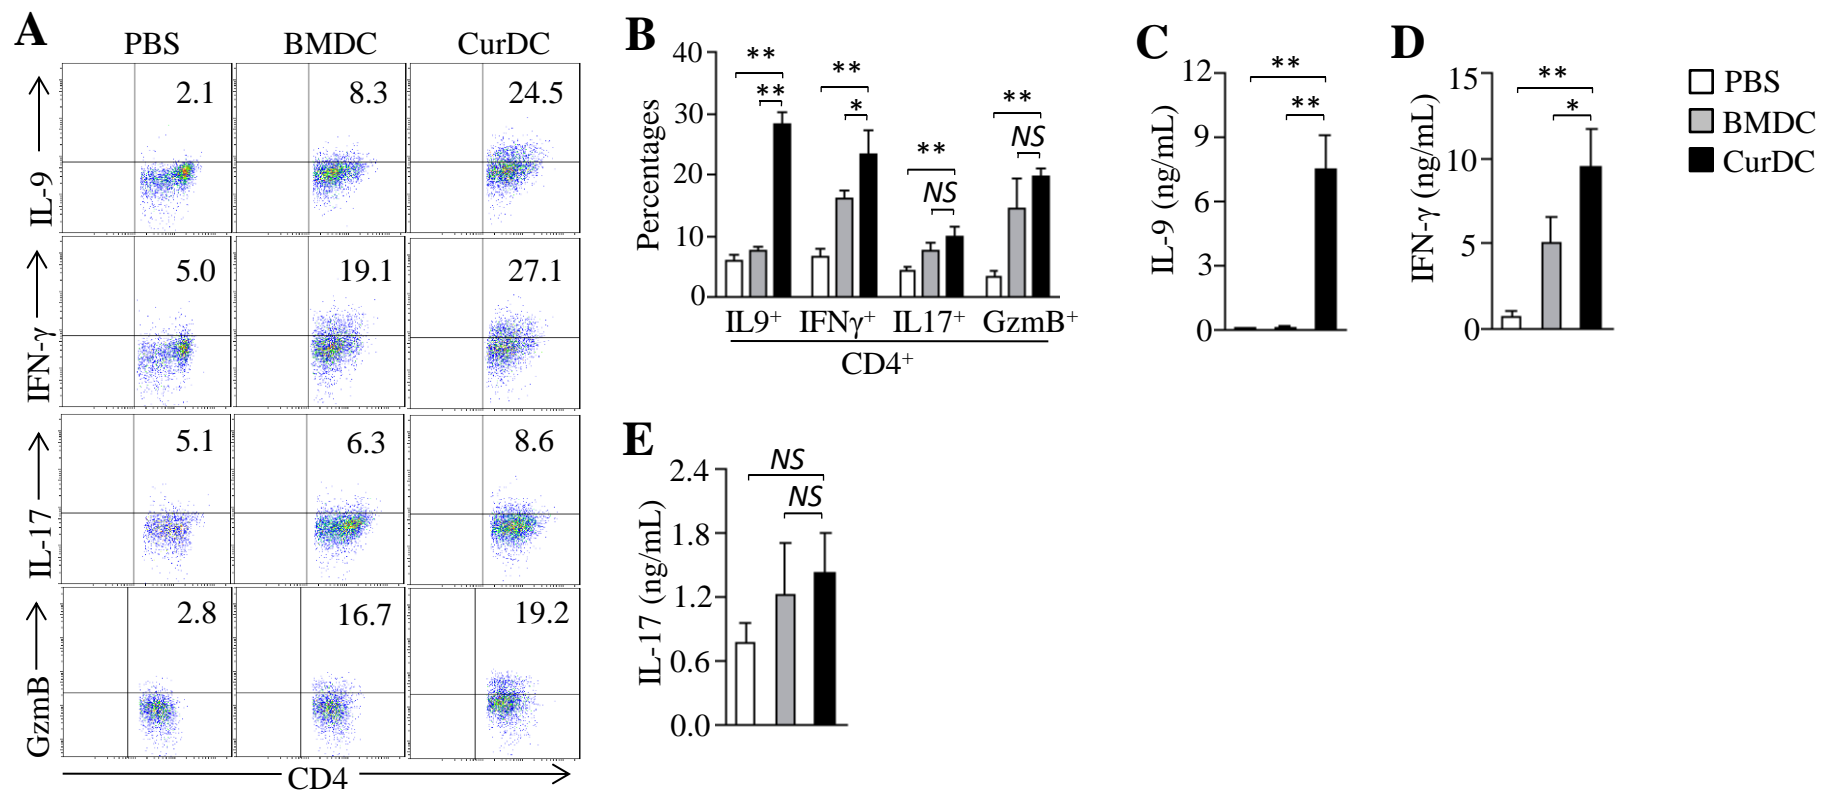

**Figure S5. Antitumor effector cells induced by dectin1-DC in vivo.** OT-II mice (2 to 3 mice/group) were immunized twice (one week apart) with OVA-peptide-pulsed BMDCs or CurDCs. PBS served as control. On day 3 after the 2<sup>nd</sup> immunization, total leukocytes from spleen cells were harvested and restimulated with OVA-peptide-pulsed BMDCs and CurDCs respectively for 48 hours in the culture. Leukocytes from PBS control mice were cultured without addition of DCs. **(A)** Flow cytometry assessed the percentages of IFN- $\gamma$ -, IL-9-, IL-17-, or GzmB-producing CD4<sup>+</sup> T cells. Numbers in the dot plots represent the percentages of Th cells. **(B)** Summarized results of three independent experiments obtained in (A). **The experiments were performed three times (n=3).** **(C-E)** ELISA examined the protein levels of IL-9 (C), IFN- $\gamma$  (D) and IL-17 (E) in the culture supernatants. **The experiments were performed three times (n=3).** Data are representative of three (A) independent experiments or presented as mean  $\pm$  SD of three (B-E) independent experiments. NS, non-significant; \* $P < 0.05$ ; \*\* $P < 0.01$  (Student *t* test).

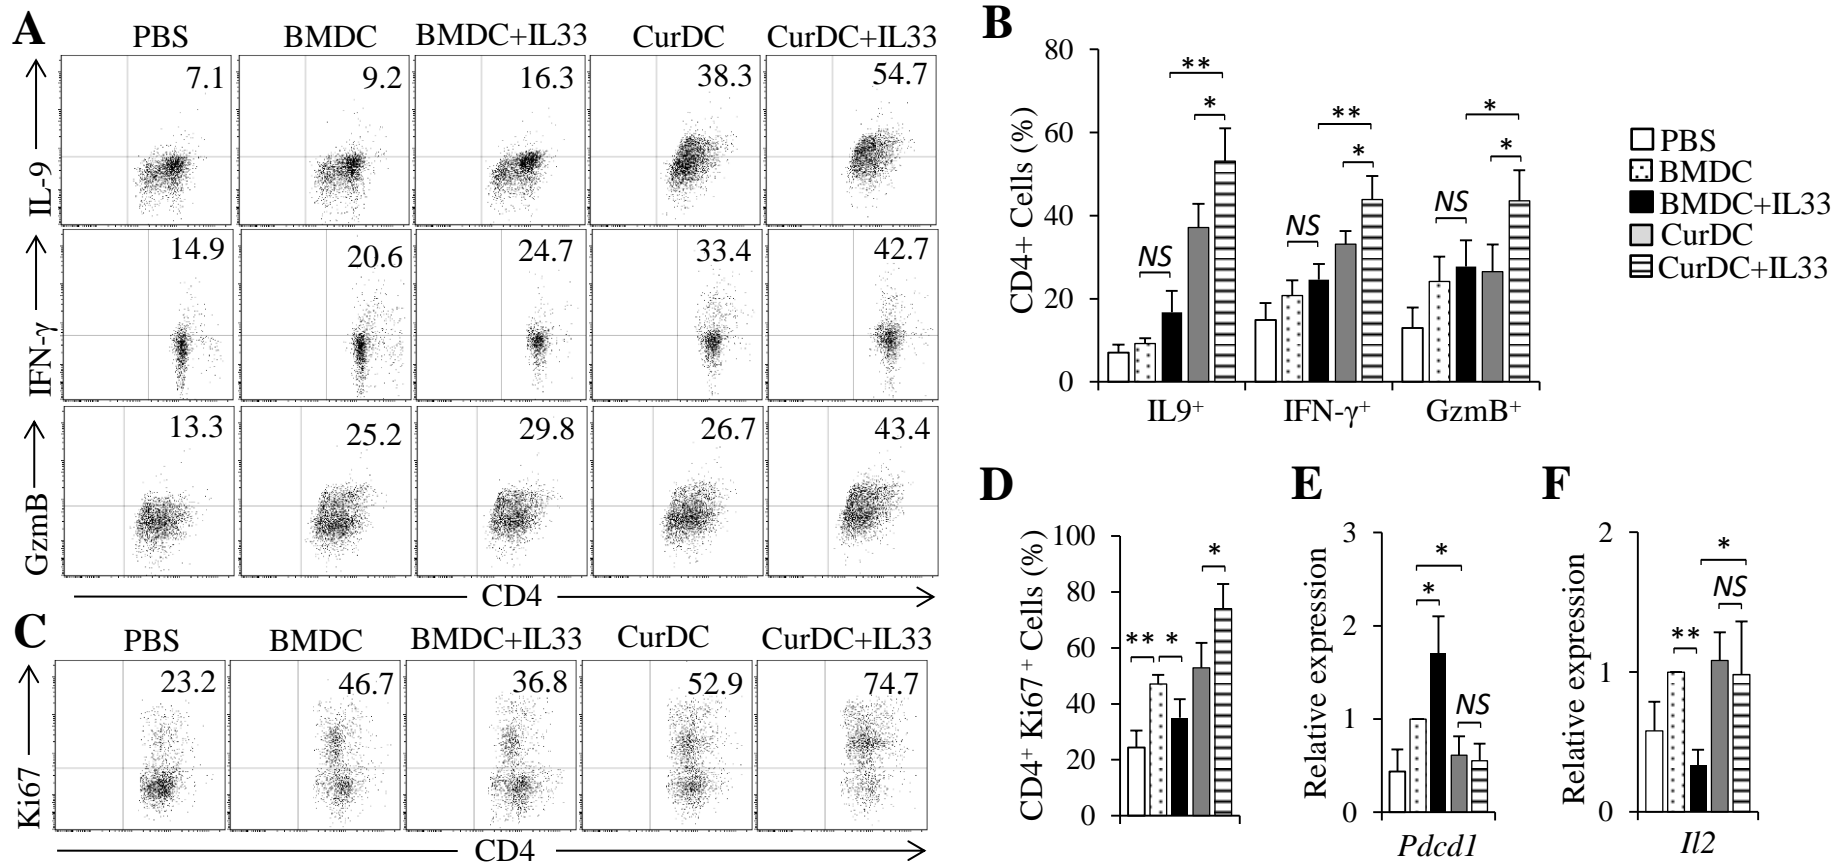

**Figure S6. The analysis of tumor infiltrating T cells in mice immunized with dectin-1-activated DCs plus IL-33.** OT-II mice were injected subcutaneously with  $1 \times 10^5$  B16-OVA cells. On day 3 after tumor challenge, mice (2 to 3 mice/group) were given two weekly subcutaneously immunizations with  $1 \times 10^6$  OVA-peptide-pulsed BMDCs or CurDCs with or without addition of IL-33 (250 ng/mouse). On day 3 after the second immunization, CD4<sup>+</sup> T cells were isolated from tumor tissues by MACS and restimulated with BMDCs or CurDCs in the presence or absence of IL-33 (50 ng/mL) respectively for 24 hours. (A) Flow cytometry analysis of IL-9- IFN- $\gamma$  or GzmB-producing CD4<sup>+</sup> T cells. Numbers in the dot plots represent the percentages of double-positive T cells. (B) summarized results of three independent experiments obtained in (A). The experiments were performed three times (n=3). (C) Flow cytometry analysis of Ki67<sup>+</sup>CD4<sup>+</sup> T cells. Numbers in the dot plots represent the percentages of Ki67<sup>+</sup>CD4<sup>+</sup> T cells. (D) summarized results of three independent experiments obtained in (C). The experiments were performed three times (n=3). (E,F) CD4<sup>+</sup> T cells were isolated by MACS. qPCR examined the expression of *Pdccl1* (E) and *Il2* (F) in CD4<sup>+</sup> T cells. The experiments were performed three times (n=3). Data are representative of three (A,C) independent experiments or presented as mean  $\pm$  SD of three (B,D-F) independent experiments. NS, non-significant; \* $P < 0.05$ ; \*\* $P < 0.01$ .
